# Supplementary material
Source: Springer Nature journal article supplement (https://www.springermedizin.de/resource/supplementary/12889_2007_823_MOESM4_ESM.pdf/9501850)
Supplement: MOESM4 [file 9501850]

Potentially relevant studies identified: citations or abstracts screened for retrieval (n= 1146)

Studies excluded (n= 686)

Full studies retrieved for more detailed evaluation (n= 460)

Studies excluded (n= 306)  
Prognostic studies, CRP used as exposure

Potentially appropriate studies to be included in the analysis (n= 154)

Studies excluded from analysis (n= 87)  
Not meeting inclusion criteria: Independent variables not relevant

Studies included in analysis (n= 67)

Studies withdrawn (n= 35)  
Not meeting inclusion criteria: Sampling criteria

Studies with usable information (n= 32)

40 analyses:  
25 Socioeconomic position  
15 Ethnicity/race
